# Supplementary material
Source: Springer Nature journal article supplement (https://www.springermedizin.de/resource/supplementary/12990_2012_507_MOESM2_ESM.pdf/9613448)

A Dil<sup>+</sup> dural

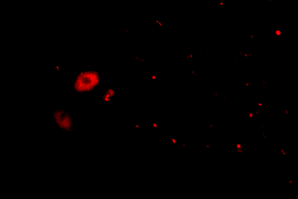

B FG<sup>+</sup> skin

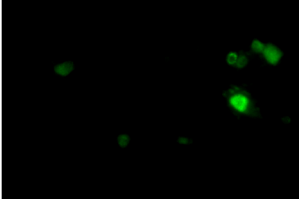

C merged

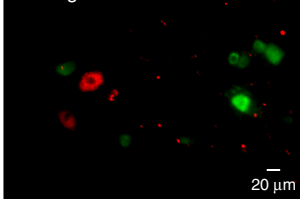

Supplement: MOESM2 [file 9613448]
